# Supplementary material for: Facile synthesis and characterization of a reduced graphene oxide/halloysite nanotubes/hexagonal boron nitride (RGO/HNT/h-BN) hybrid nanocomposite and its potential application in hydrogen storage
Source: Royal Society of Chemistry journal article supplement (doi:10.1039/c6ra13865a), 2016-01-01
Supplement: c6ra13865a1.pdf [file c6ra13865a1.pdf]

1 **Supplementary Information**

2  
3 **Facile Synthesis and Characterization of Reduced Graphene Oxide / Halloysite**  
4 **Nanotubes / Hexagonal Boron Nitride (RGO/HNT/h-BN) Hybrid Nanocomposite**  
5 **and its Potential Application as Hydrogen Storage**

6 R. Naresh Muthu <sup>a</sup>, S. Rajashabala <sup>a,\*</sup> and R. Kannan <sup>b</sup>

7 <sup>a</sup> School of Physics, Madurai Kamaraj University, Madurai-625021, Tamil Nadu, India

8 <sup>b</sup> Department of Physics, University College of Engineering, Anna University, Dindigul-624622, Tamil  
9 Nadu, India

10 \*email: rajashabala@yahoo.com

11 **XRD Analysis**

12 Fig. S1 shows the XRD pattern of graphene oxide (GO) where a strong and sharp  
13 diffraction peak is observed at  $2\theta = 12.02^\circ$  with an interlayer spacing of 0.77 nm along the (002)  
14 orientation [1,2].

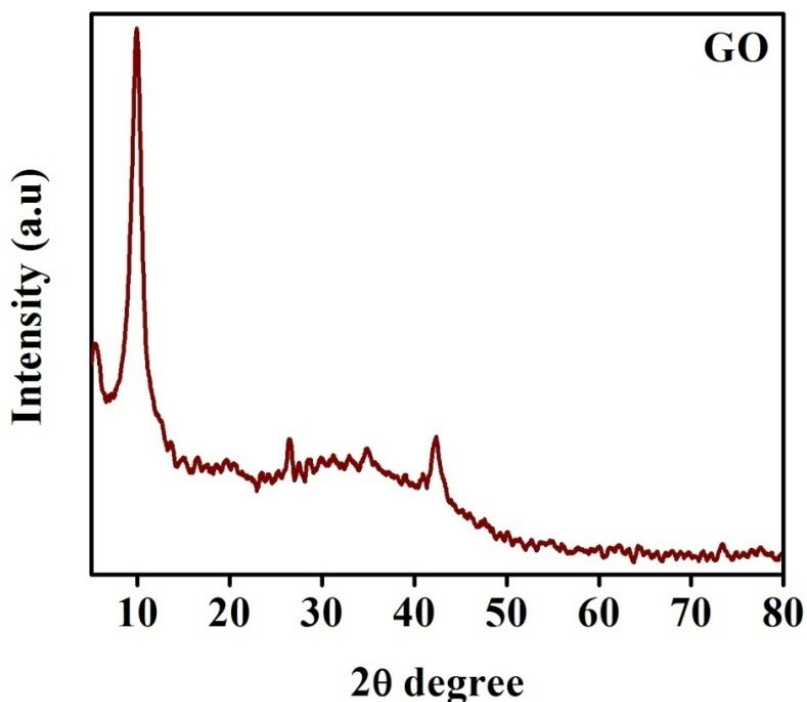

15  
16 **Fig. S1 - XRD pattern of GO**

## 18 FTIR Analysis

19 Fig. S2 shows the FTIR spectrum of GO and the characteristic peaks of GO appear at  
20 3423, 2037, 1750, 1627, 1222 and 1051  $\text{cm}^{-1}$  are assigned to the O-H stretching of absorbed  $\text{H}_2\text{O}$   
21 molecules, C-H stretching, C=O stretching vibrations of carbonyl and carboxylic groups,  $\text{sp}^2$   
22 unoxidized C=C stretching, epoxy C-O stretching vibrations and alkoxy C-O stretching  
23 vibrations, respectively [3,4]. These modes of vibrations confirm the presence of various oxygen  
24 functionalities in the prepared GO.

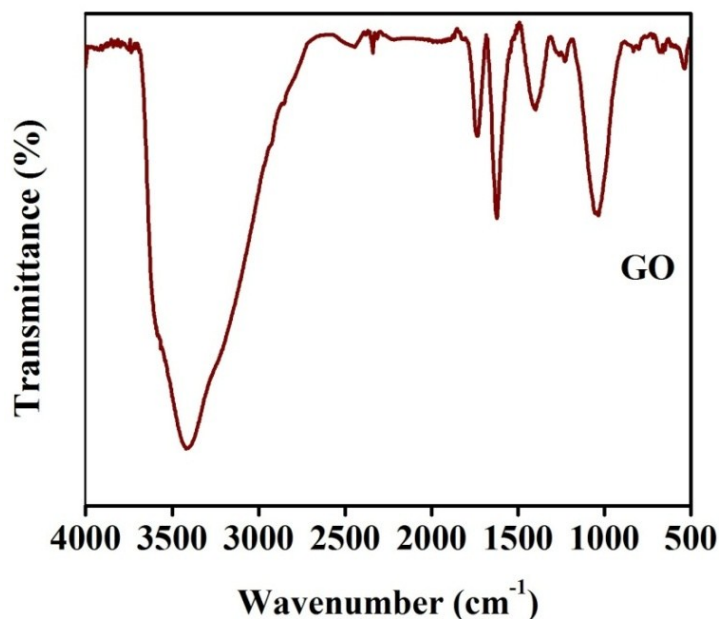

25

26

**Fig. S2 - FTIR spectrum of GO**

## 27 UV/Vis Analysis

28 The UV-Vis spectrum of GO has a sharp peak at 233 nm with a shoulder peak at 290 nm.  
29 The peak at 233 nm is attributed to the  $\pi - \pi^*$  transition of C=C bonds while the band at 290 nm  
30 corresponds to the  $n - \pi^*$  transition of C=O bonds which further confirms the presence of  
31 carbonyl groups in GO. The absorption peak at 233 nm is red-shifted during the reduction of GO  
32 into reduced graphene oxide (RGO) [5].

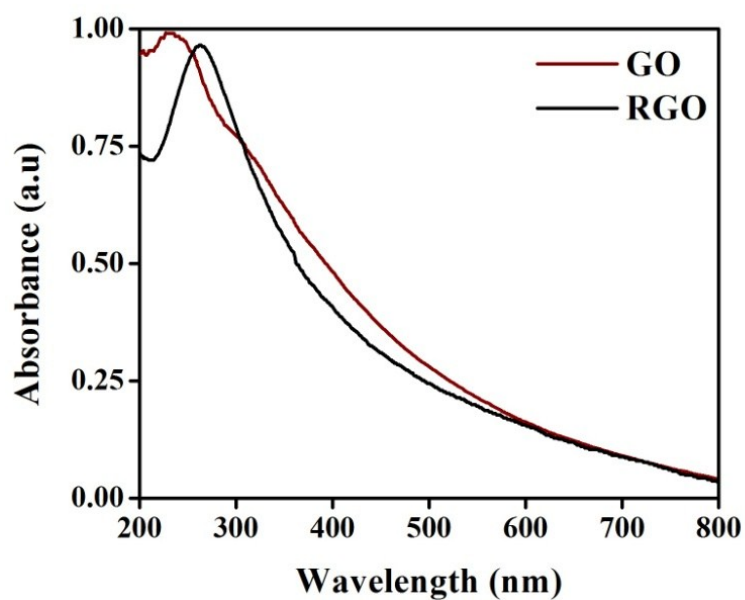

33

34

Fig. S3 - UV/Vis spectra of GO and RGO

35

36 **Elemental Mapping Analysis**

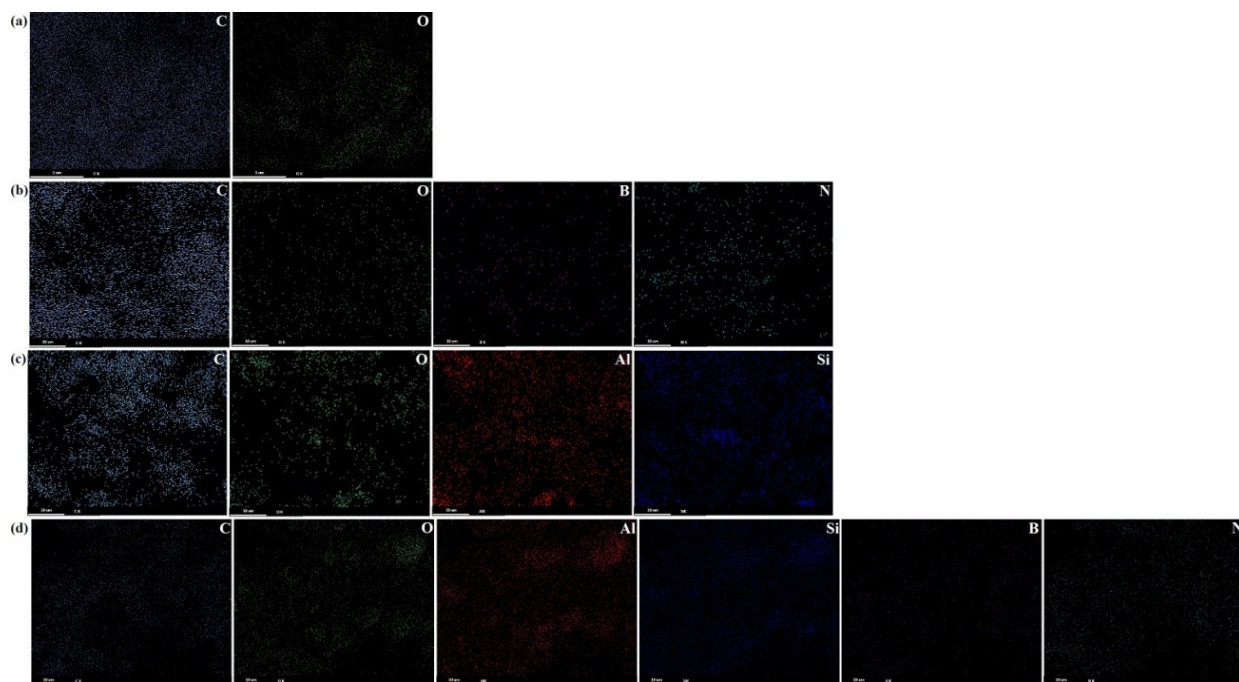

37

38 **Fig. S4 - Elemental mapping images of (a) RGO (b) RGO/h-BN (c) RGO/A-HNT and**

39 **(d) RGO/A-HNT/h-BN hybrid nanocomposites**

40

#### 41 **TG Analysis**

42 The TGA curve of GO is depicted in Fig. S5. It is observed that the prepared GO has the  
43 initial weight loss at below 100 °C which is attributed to the evaporation of adsorbed water and  
44 the second weight loss at 150 °C is due to the rapid decomposition of oxygen containing  
45 functional groups. These oxygen containing groups may arise due to the trapping of more water  
46 molecules between the GO layers [6]. These findings are well supported by XRD, FTIR and UV-  
47 Vis studies.

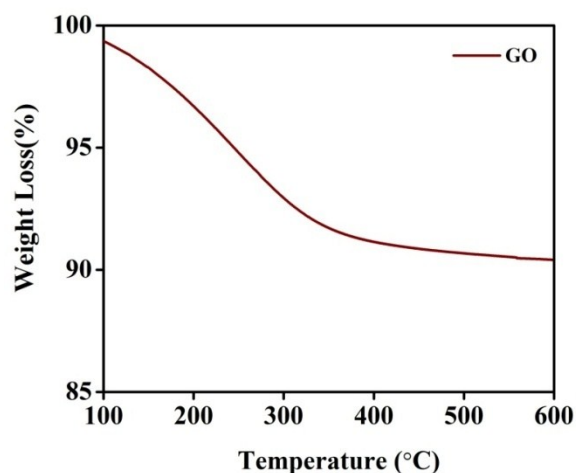

48

49

**Fig. S5 - TGA spectrum of GO**

#### 50 **FTIR Analysis for Hydrogenated Hybrid Nanocomposites**

51 The FTIR spectra of hydrogenated RGO, RGO/h-BN, RGO/A-HNT and RGO/A-HNT/h-  
52 BN hybrid nanocomposites are shown in Fig. S5. It resembles the FTIR spectra of as synthesized  
53 RGO, RGO/h-BN, RGO/A-HNT and RGO/A-HNT/h-BN hybrid nanocomposites except the  
54 overall decrease in intensity.

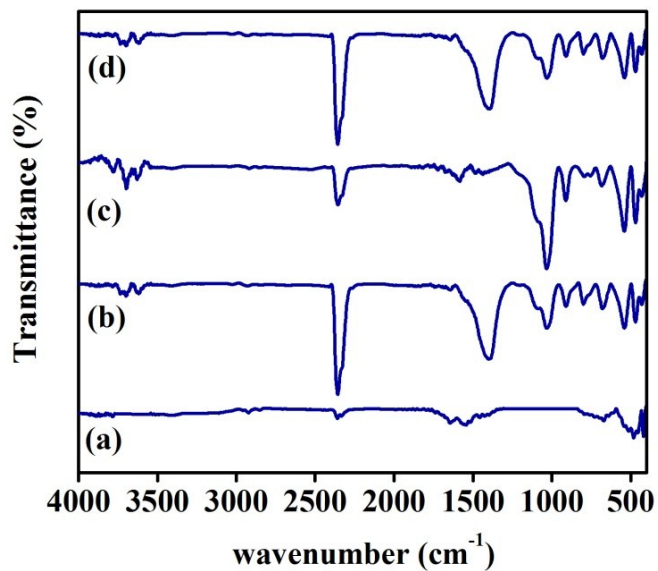

55

56 **Fig. S6 - FTIR spectra of hydrogenated (a) RGO (b) RGO/h-BN (c) RGO/A-HNT and**  
57 **(d) RGO/A-HNT/h-BN hybrid nanocomposites**

58

59

60

61

62

63

64

65

66

67

68

69

70

71

72

73

## 74 References

- 75[1] Shah MSAS, Park AR, Zhang K, Park JH, Yoo PJ. Green Synthesis of Biphasic TiO<sub>2</sub>  
76 –Reduced Graphene Oxide Nanocomposites with Highly Enhanced Photocatalytic Activity.  
77 ACS Appl Mater Interfaces 2012;4:3893–3901
- 78[2] Fan W, Lai Q, Zhang Q, Wang Y. Nanocomposites of TiO<sub>2</sub> and Reduced Graphene Oxide as  
79 Efficient Photocatalysts for Hydrogen Evolution. J Phys Chem C 2011;115:10694–701
- 80[3] Liu G, Gui S, Zhou H, Zeng F, Zhou Y, Ye H. A strong adsorbent for Cu<sup>2+</sup>: graphene oxide  
81 modified with triethanolamine. Dalton Trans 2014;43:6977–80
- 82[4] Liu X, Pan L, Lv T, Zhu G, Lu T, Sun Z, Sun C. Microwave-assisted synthesis of TiO<sub>2</sub>-  
83 reduced graphene oxide composites for the photocatalytic reduction of Cr(VI). RSC Adv  
84 2011;1:1245-9
- 85[5] Das AK, Srivastav M, Layek RK, Uddin ME, Jung D, Kim NH, Lee JH. Iodide-mediated  
86 room temperature reduction of graphene oxide: a rapid chemical route for the synthesis of a  
87 bifunctional electrocatalyst J Mater Chem A 2014;2:1332–40
- 88[6] Wang R, Wang Y, Xu C, Sun J, Gao L. Facile one-step hydrazine-assisted solvothermal  
89 synthesis of nitrogen-doped reduced graphene oxide: reduction effect and mechanisms. RSC  
90 Adv 2013;3:1194–1200

91

92

93

94

95

96

97

98

99 **Figure captions**

100 **Fig. S1 - XRD pattern of GO**

101 **Fig. S2 - FTIR spectrum of GO**

102 **Fig. S3 - UV/Vis spectra of GO and RGO**

103 **Fig. S4 - Elemental mapping images of (a) RGO (b) RGO/h-BN (c) RGO/A-HNT and**  
104 **(d) RGO/A-HNT/h-BN hybrid nanocomposites**

105 **Fig. S5 - TGA spectrum of GO**

106 **Fig. S6 - FTIR spectra of hydrogenated (a) RGO (b) RGO/h-BN (c) RGO/A-HNT and**  
107 **(d) RGO/A-HNT/h-BN hybrid nanocomposites**
